# Supplementary material
Source: Frontiers journal article supplement (https://www.frontiersin.org/articles/410742)
Supplement: Data_Sheet_4.PDF [file Data_Sheet_4.PDF]

### How long does the simulator sickness persist after VR exposure?

| Authors and publication date       | Study design (between or within subject) | Number of participants | Type of virtual reality technology used                          | Time of simulator/VR exposure                                  | Method of measurement                                         | Periods when simulator sickness was measured                                                                                                                                                   | Results (concerning the temporal aspect)                                                                                                                                                                                                                             |
|------------------------------------|------------------------------------------|------------------------|------------------------------------------------------------------|----------------------------------------------------------------|---------------------------------------------------------------|------------------------------------------------------------------------------------------------------------------------------------------------------------------------------------------------|----------------------------------------------------------------------------------------------------------------------------------------------------------------------------------------------------------------------------------------------------------------------|
| Tanaka and Takagi, 2004            | within subject                           | 14                     | HMD                                                              | Not given                                                      | Simulator Sickness Questionnaire                              | After exposure                                                                                                                                                                                 | The symptoms persist after leaving VR, the length of persistence depends on the initial severity of the symptoms: more severe – > 30 min, less severe – no longer than 5 min                                                                                         |
| Bos, MacKinnon and Patterson, 2005 | within subject                           | 24                     | Ship motion simulator – a ship bridge, motion platform, screen   | Three sessions with no more than 1 day break, five 5-min tasks | Misery Scale (MISC – 0-10 scale)                              | Before the session, 8 times during the tasks (before, after task explanation, after each of the tasks + 1 additional); after leaving the simulator: after 2, 5, 10, 15, 30, 60, 90 and 120 min | Symptoms persist for some time, return to baseline in an hour after exposure. Only 4/24 subjects did not fully recover after 2 hours.                                                                                                                                |
| Keshavarz et al., 2018             | between subject                          | 121                    | Car simulator – body of a car, projection screen                 | Practice drive + four drives, each 5-7 min                     | Fast Motion Sickness Scale                                    | Every minute during the task and after the exposure: immediately after and 1, 2, 3, 5, 10 and 15 minutes after exposure                                                                        | The participants who dropped out of the experiment needed more time to recover than those who finished it. Only 5 subjects did not fully recover after 15 min. All subjects – significant decrease of symptoms between immediately after exposure and 3 min later    |
| Singer, Ehrlich and Allen, 1998    | within subject                           | 32                     | Virtual Research Corporation VR4 HMD                             | Not given                                                      | Simulator Sickness Questionnaire                              | Before VR exposure, “Mid-Experiment”, “Post-Experiment”, after 30 min rest                                                                                                                     | All of the symptoms, except for disorientation, return to baseline after 30 min.                                                                                                                                                                                     |
| McCauley et al., 1990              | within subject                           | 48                     | Flight simulator – motion system, a cockpit, screen              | 10 min training + 4 10-min trials                              | “SSEQ” – Simulator Sickness Questionnaire and a 8-point scale | Immediately after VR exposure and 30 min later                                                                                                                                                 | Severity of symptoms decreases between the measurement time points.                                                                                                                                                                                                  |
| Braithwaite and Braithwaite, 1990  | between subject                          | 115                    | Helicopter simulator – with the body of a helicopter and screens | Not specified in detail, different across participants         | After a session                                               | Qualitative assessment                                                                                                                                                                         | Six participants: severe headaches (lasting for 2-6 hours).<br>Two participants: nausea (up to 2 hours post exposure).<br>Six participants: other symptoms, e.g. visual flashbacks, unsteadiness or symptoms different than ones experienced during the VR exposure. |

|                                                |                 |    |                                                        |                                                                                                    |                                                                  |                                                                                                                                                                  |                                                                                                                                                                                                                                                           |
|------------------------------------------------|-----------------|----|--------------------------------------------------------|----------------------------------------------------------------------------------------------------|------------------------------------------------------------------|------------------------------------------------------------------------------------------------------------------------------------------------------------------|-----------------------------------------------------------------------------------------------------------------------------------------------------------------------------------------------------------------------------------------------------------|
| Moss, Muth, 2011                               | between subject | 80 | HMD; locating objects in VR (head movements)           | Five 2-min trials                                                                                  | Simulator Sickness Questionnaire (orally; pre-recorded cassette) | SSQ: before the experiment (pre-practice), after the practice sessions, after each trial (5 times), 5 min post exposure, 10 min post exposure = 9 times in total | 10 min post exposure – significantly higher SSQ total score than the pre-practice score.                                                                                                                                                                  |
| Moss et al., 2011                              | within subject  | 22 | HMD                                                    | Two sessions separated by 7 days: 2 48-s practice trials + 5 2-min trials = circa 12 min each time | Simulator Sickness Questionnaire                                 | Baseline, after practice trials, after each trial, 5 and 10 min post exposure                                                                                    | Symptoms return to baseline after a 10-min rest.                                                                                                                                                                                                          |
| Biernacki, Dziuda, 2014<br>Dziuda et al., 2014 | within subject  | 12 | Truck simulator (a cabin of a truck + cylinder screen) | Two 30-min trials with one-week break (fixed-base and mobile platform)                             | Simulator Sickness Questionnaire                                 | For each trial: before simulator exposure, 2 min after exposure, 30 min after exposure = 6 times in total                                                        | Total SSQ score, nausea, disorientation and oculomotor disturbance levels higher 2 min after exposure than 30 min after exposure.<br>Total SSQ score, oculomotor disturbance and disorientation higher 2 min after exposure than prior to the experiment. |
| Malińska et al., 2014                          | within subject  | 20 | Virtual workstation                                    | Circa 2 hours, three sessions                                                                      | Self-developed questionnaire (8 symptoms)                        | Questionnaire: straight after simulator exposure, 20 minutes later, up to 24 hours after simulator exposure (e-mail) = 3 times in total                          | Simulator sickness symptoms reported 4 hours after simulator exposure - dizziness, headache, disorientation, drowsiness and 5 hours after 3D movie viewing - drowsiness, apathy, fatigue, eye ache, headache, dizziness, nausea (minor severity).         |
